# Supplementary material
Source: Springer Nature journal article supplement (https://www.springermedizin.de/resource/supplementary/12877_2010_587_MOESM2_ESM.pdf/9439920)
Supplement: MOESM2 [file 9439920]

|                                         | <b>Instruments</b>                                                                                                                   | <b>When &amp; who?</b>                    | <b>Baseline</b>                             | <b>3 months</b><br>(= ca. 12-13 weeks)      | <b>6 months</b><br>(= ca. 26 weeks) |
|-----------------------------------------|--------------------------------------------------------------------------------------------------------------------------------------|-------------------------------------------|---------------------------------------------|---------------------------------------------|-------------------------------------|
| <i>Selection criteria</i>               | - GDS (Reisberg)<br>- MDS-CPS                                                                                                        | Pre selection<br>Pre selection            | NHP<br>NHP                                  |                                             |                                     |
| <i>Primary Outcome</i>                  | - CMAI<br>- MDS-RAI pain scale<br>- NPI-NH<br>- PACSLAC-D                                                                            | Incl.<br>Incl.<br>Incl.<br>Incl.          | Nurse<br>Nurse<br>Nurse<br>Nurse &<br>VIDEO | Nurse<br>Nurse<br>Nurse<br>Nurse &<br>VIDEO | Nurse<br>Nurse<br>Nurse<br>Nurse    |
| <i>Secondary Outcome</i>                | - Qualidem<br>- Cornell & MDS-DRS<br>- Medication<br>- DS-DAT<br>- FACS                                                              | Incl.<br>Incl.<br>Incl.<br>Incl.<br>Incl. | Nurse<br>Nurse<br>RA<br>VIDEO<br>VIDEO      | Nurse<br>Nurse<br>RA<br>VIDEO<br>VIDEO      | Nurse<br>Nurse<br>RA                |
| <i>Control variables / Demographics</i> | - (co-) Morbidity<br>- Hospitalisation, fixation etc.<br>- Demographics; sex, age, background<br>- ADL (Katz)<br>- Apolipoprotein E4 | Incl.<br>Incl.<br>Incl.<br>Incl.<br>Incl. | NHP<br>RA<br>RA<br>Nurse<br>RA              | RA                                          | RA                                  |

NHP = Nursing Home Physician, Nurse = caregiver, RA = research assistant, Incl. = included residents
